# Supplementary material
Source: publisher site journal article supplement (https://www.dovepress.com/article/411658)
Supplement: Supplementary file 1 [file get_supplementary_file.php]

**Supplementary Figures**


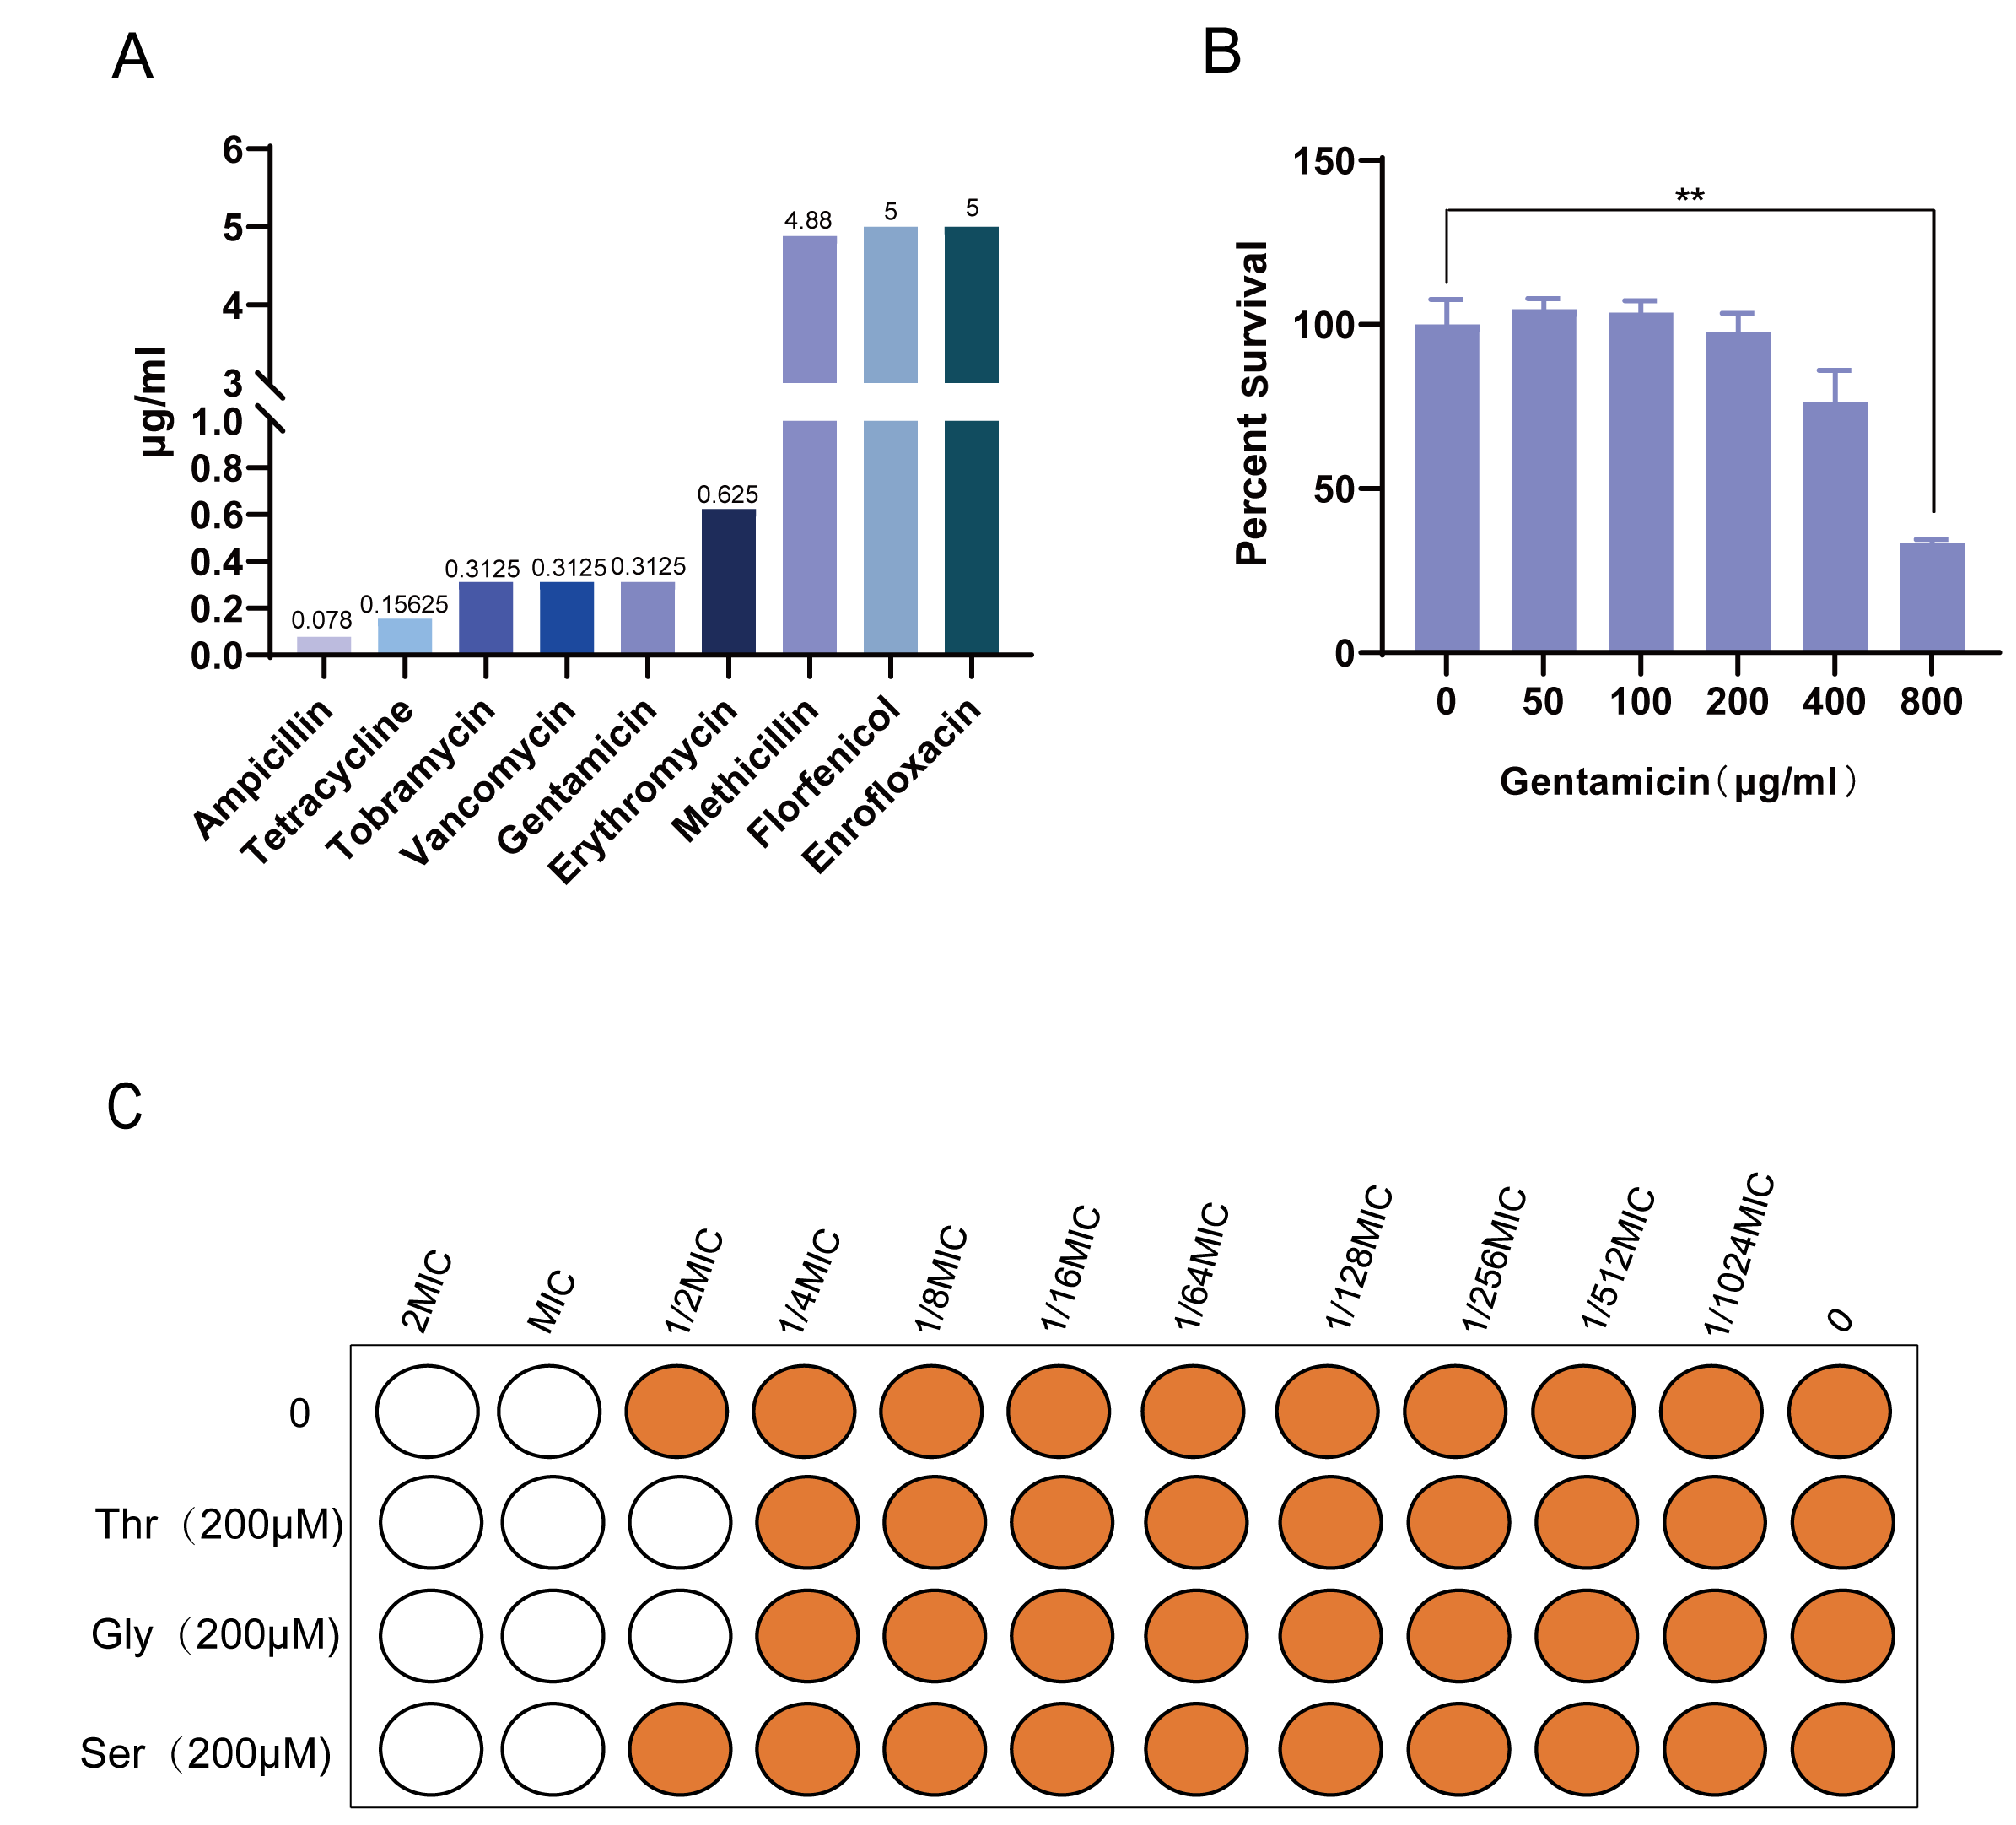


**Figure S1** MIC and percent survival of MRSA. (**A**) MIC of MRSA to various antibiotics. (**B**) Percent survival of MRSA in the indicated gentamicin concentrations. (**C)** Amino acids combined with gentamicin affected MIC of MRSA to gentamicin. ***p* < 0.01 was determined by Student’s t test.


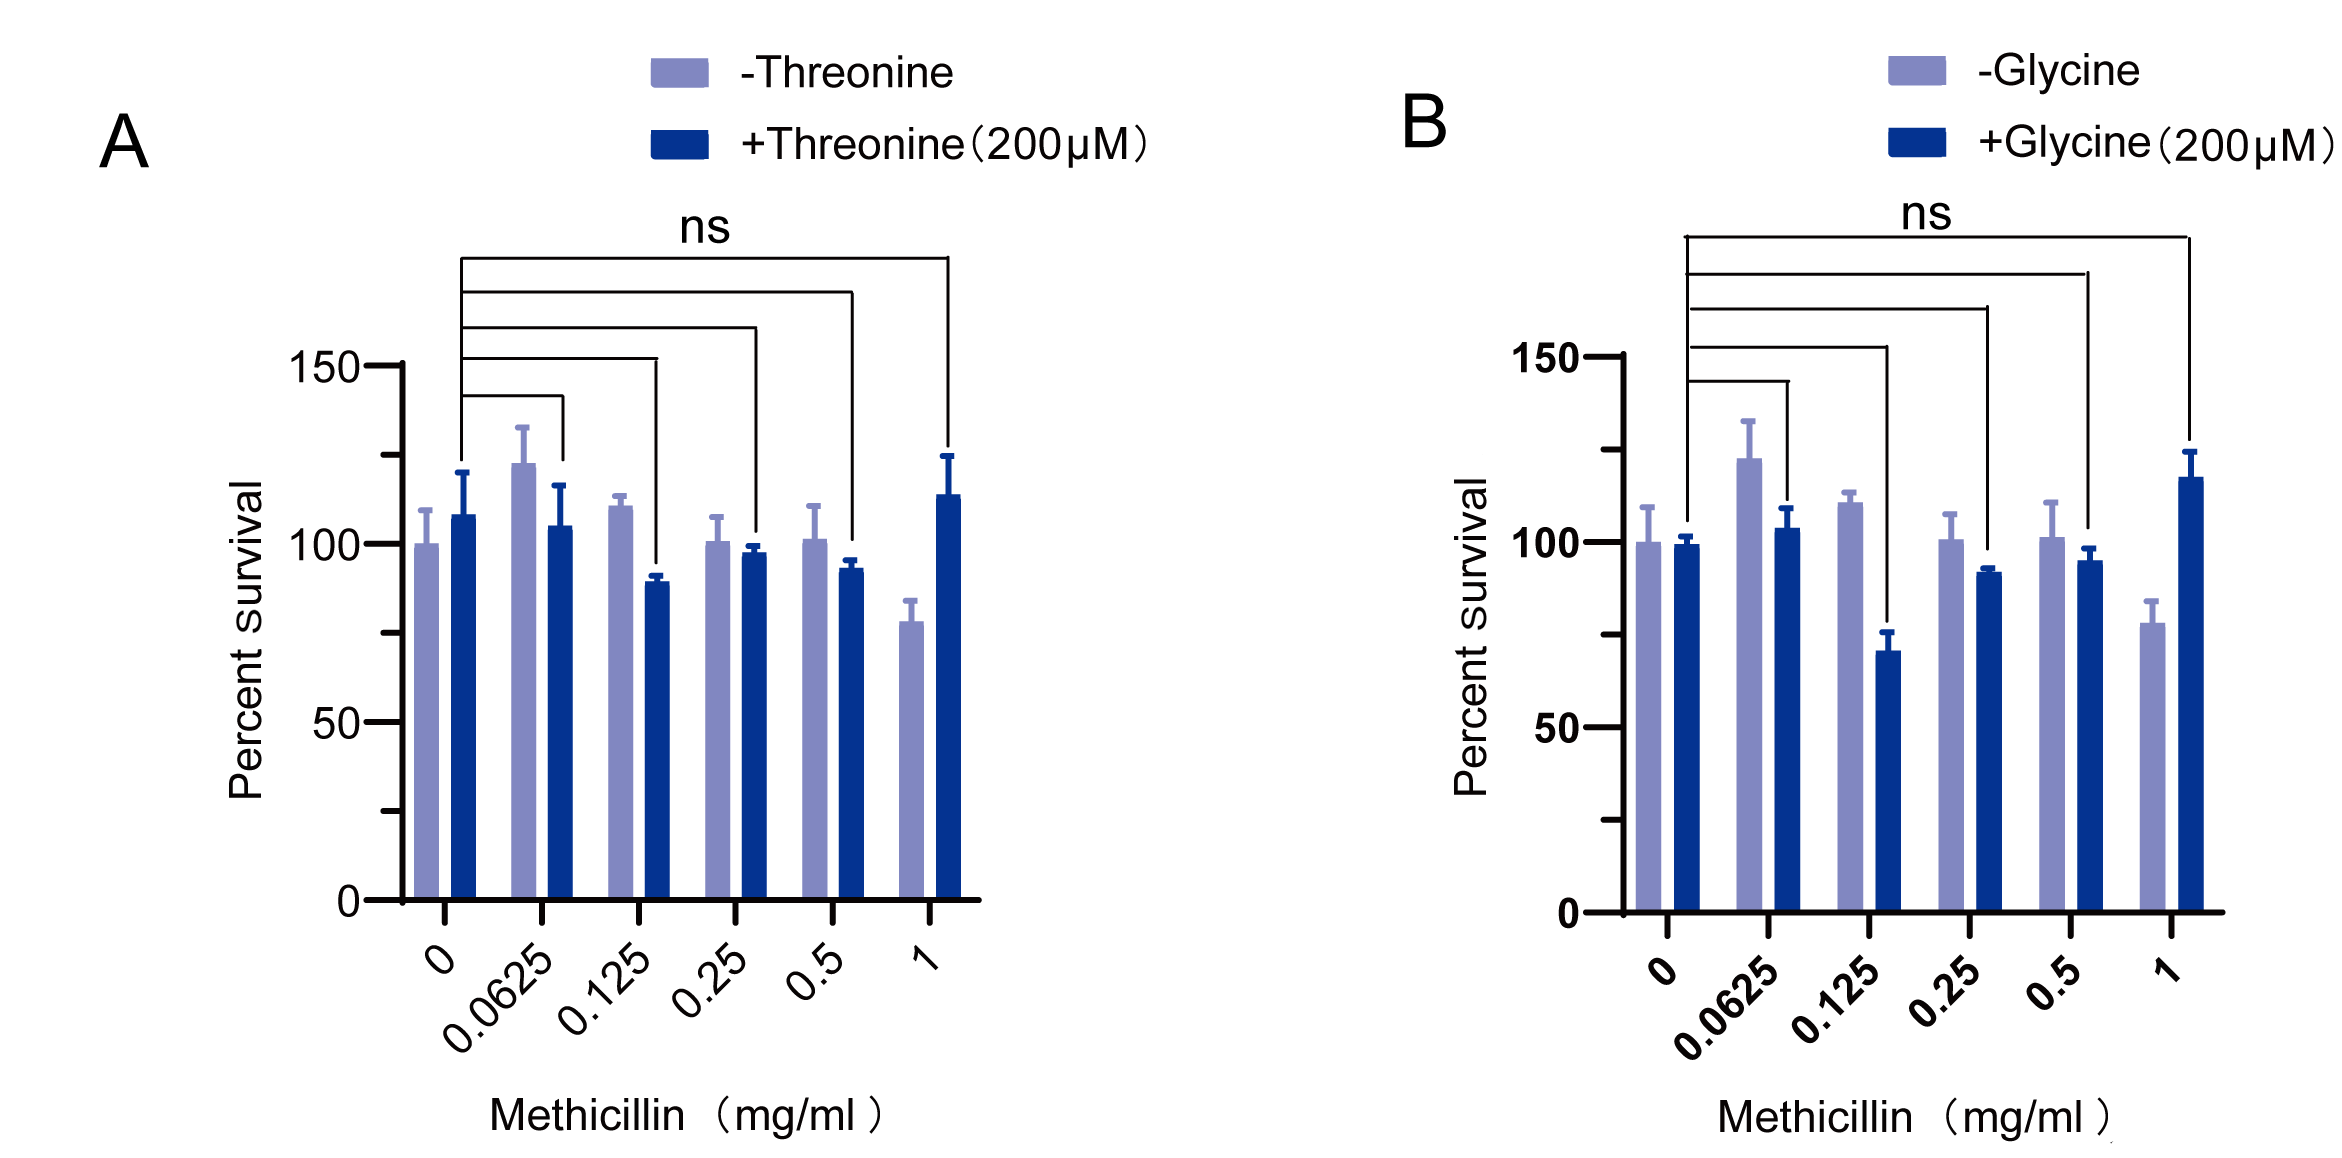


**Figure S2** Effect of exogenous amino acids on susceptibility of MRSA to methicillin. Percent survival of MRSA in the presence or absence of threonine (**A**) or glycine (**B**) in the indicated methicillin concentrations. All data was determined by Student’s t test. ns, no significant difference.

**Supplementary Table**

**Table S1** lists the number of deaths per day for each group of mice


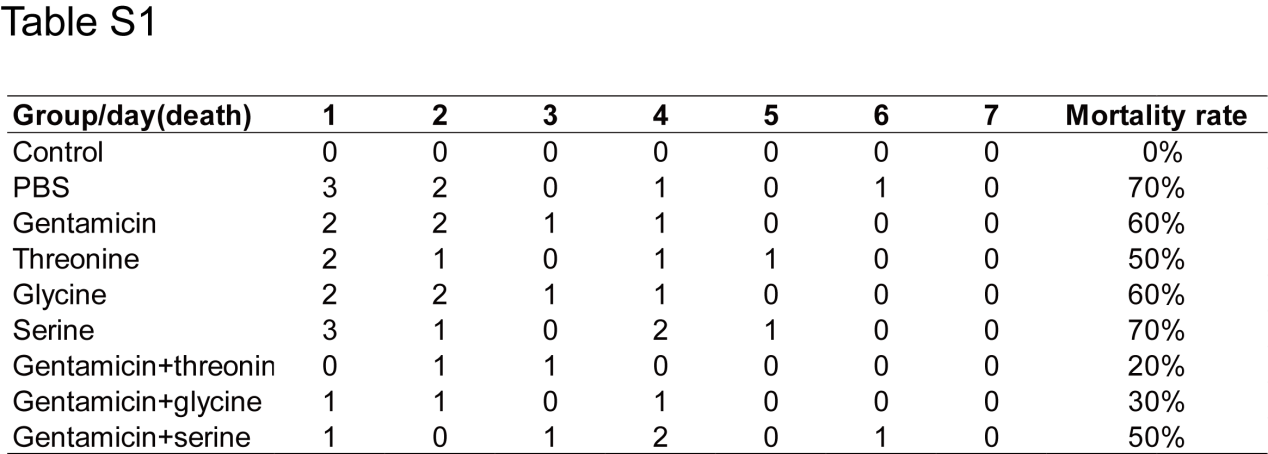


Mice were divided into 9 groups, in which the Control group represented bacteria non-injection, and the other 8 groups all had injection bacteria.
